# Supplementary material
Source: publisher figshare collection journal article supplement (https://tandf.figshare.com/articles/dataset/_/21829536)
Supplement: Supplementary file 1 [file 1]

## **Analiza wpływu dziecięcego maltretowania na seksualną agresję wśród adolescentów: testowanie wielokrotnego modelu mediacyjnego w populacji duńskich nastolatków nie będących w więzieniu**

Rikke Holm Bramsen

Celem niniejszego artykułu była analiza wpływu dziecięcego maltretowania na seksualną agresję wśród adolescentów przy użyciu wielokrotnego modelu mediacyjnego. Zbadano 330 nastolatków płci męskiej (średni wiek 14,9 lat; SD=0,5). Współczynniki modelu mediacyjnego wskazały na pośredni efekt fizycznego maltretowania w dzieciństwie na obecną seksualną agresję, utrzymywaną również przez obecne poczucie własnej wrogo-nieprawnej męskości. Nie otrzymano z kolei istotnych statystycznie efektów ogólnego zaniedbania i wykorzystania seksualnego w dzieciństwie na obecną seksualną agresję przejawianą przez zbadanych adolescentów. Wyniki niniejszych badań wskazują na czynniki ryzyka agresji seksualnej wśród nastolatków i mogą być wykorzystane do budowy odpowiednich programów prewencyjnych.

Słowa kluczowe: agresja seksualna, dziecięce maltretowanie, adolescencja, model mediacyjny

Name of translator: Marcin Rzesutek, University of Finance and Management in Warsaw, Poland.

**Citation:** European Journal of Psychotraumatology 2014, 5: 24533 - <http://dx.doi.org/10.3402/ejpt.v5.24533>
