# Supplementary material
Source: publisher figshare collection journal article supplement (https://tandf.figshare.com/articles/dataset/_/21829536)
Supplement: Supplementary file 2 [file 1]

Исследование влияния жестокого обращения с ребенком на подростковую сексуальную агрессию: Тестирование выборки датских не судимых подростков с помощью шкальной опосредованной модели

Rikke Holm Bramsen, Mathias Lasgaard, Mary P. Koss, Ask Elklit, Jytte Banner

Целью настоящего исследования было изучение взаимосвязи между плохим обращением с детьми и жестокой ранней подростковой сексуальной агрессией, используя шкальную опосредованную модель. В исследовании приняли участие 330 девятиклассников мужского пола со средним возрастом 14,9 лет ( $SD = 0,5$ ). Результаты тестирования выявили значимые косвенные эффекты влияния детского физического насилия на сексуальную агрессию в виде равного влияния и неуверенно-враждебной мужественности. Значимый общий эффект воздействия сексуального насилия над детьми и безнадзорности на сексуальную агрессию не обнаружен. Полученные в настоящем исследовании данные идентифицируют факторы риска, которые потенциально изменчивы и, следовательно, должны учитываться в разработке программ профилактики ранней подростковой сексуальной агрессии у молодежи из групп риска.

Ключевые слова: сексуальная агрессия, плохое обращение с детьми, пубертатный возраст, опосредованная модель

Name of translator: Marina Shcherbak

Citation: European Journal of Psychotraumatology 2014, 5: 24533 - <http://dx.doi.org/10.3402/ejpt.v5.24533>
