# Supplementary material
Source: publisher figshare collection journal article supplement (https://tandf.figshare.com/articles/dataset/_/21829536)
Supplement: Supplementary file 3 [file 1]

**Investigando el efecto del maltrato infantil sobre la agresión sexual entre compañeros en la adolescencia: Prueba de un modelo de múltiples mediadores con una muestra de adolescentes daneses no encarcelados.**

Rikke Holm Bramsen

El objetivo del presente estudio fue investigar la relación entre el maltrato infantil y la agresión sexual grave y temprana entre compañeros adolescentes utilizando un modelo de mediador múltiple. El estudio se realizó con 330 estudiantes masculinos del 9º grado con una edad media de 14,9 años ( $DE = 0.5$ ). Las estimaciones del modelo de mediación indicaron efectos indirectos significativos del abuso físico infantil sobre la agresión sexual a través de la presión de grupo y una masculinidad insegura y hostil. No se encontró un efecto total significativo del abuso sexual infantil y la negligencia infantil sobre la agresión sexual. Los hallazgos de este estudio identifican factores de riesgo que son potencialmente modificables y por lo tanto tienen valor a la hora de determinar el diseño de programas de prevención dirigidos a la agresión sexual temprana entre compañeros adolescentes en jóvenes de alto riesgo.

Keywords: agresión sexual, maltrato infantil, adolescencia, modelo de mediador

Name of translator: Miriam Ramos Morrison

Citation: European Journal of Psychotraumatology 2014, **5**: 24533 - <http://dx.doi.org/10.3402/ejpt.v5.24533>
