# Supplementary material
Source: publisher figshare collection journal article supplement (https://tandf.figshare.com/articles/dataset/_/21829536)
Supplement: Supplementary file 4 [file 1]

**Istraživanje efekata dečijeg zlostavljanja na adolescentnu vršnjačku seksualnu agresiju: testiranje Multiple Mediator Model-ana uzorku danskih ne-zatvorenih adolescenata**

Rikke Holm Bramsen

Cilj aktuelne studije jeste da ispita vezu između dečijeg zlostavljanja i teške rane adolescentne vršnjačke seksualne agresije, koristeći multiple mediator model. Studija je uključila 330 učenika IX razreda sa prosekom godina 14.9 (Mean=14.9, SD=0.5). Procene iz mediation modela ukazuju na značajne indirektne efekte dečijeg fizičkog zlostavljanja na seksualnu agresiju preko uticaja vršnjaka i nesigurne-hostilne muškosti. Ni jedan značajan efekat dečijeg seksualnog zlostavljanja i dečijeg zanemarivanja nije nađen prema seksualnoj agresiji. Nalazi aktuelne studije identifikuju faktore rizika koji su moguće promenljivi i zato imaju vrednost u pripremi dizajna preventivnih programa kod mladih koji su u riziku da razviju seksualno zlostavljanje vršnjaka.

Keywords: seksualna agresija, dečije zlostavljanje, adolescencija, mediator model

Name of translator: Maja Milosavljevic

**Citation:** European Journal of Psychotraumatology 2014, 5: 24533 - <http://dx.doi.org/10.3402/ejpt.v5.24533>
