# Supplementary material
Source: publisher figshare collection journal article supplement (https://tandf.figshare.com/articles/dataset/_/21829536)
Supplement: Supplementary file 5 [file 1]

**Eine Untersuchung der Auswirkungen von Kindesmisshandlung auf sexuelle Aggression unter Jugendlichen: Ein multiples Mediatoren Modells bei einer Stichprobe nicht inhaftierter dänischer Jugendlicher.**

Rikke Holm Bramsen

Das Ziel der vorliegenden Studie war es, die Beziehung zwischen Kindesmisshandlung und schwerer sexueller Aggression unter Jugendlichen mittels eines multiplen Mediatoren Modells zu untersuchen. Die Studie wurde mit 330 männlichen Schülern der neunten Schulstufe mit einem mittleren Alter von 14.9 Jahren ( $SA = 0.5$ ) durchgeführt. Die Schätzer der Mediatoren Analyse zeigten signifikante indirekte Effekte von körperlicher Kindesmisshandlung auf sexuelle Aggression, vermittelt über den Einfluss der Peergruppe und unsicherer-feindlicher Maskulinität. Es wurde kein signifikanter Gesamteffekt von sexueller Kindesmisshandlung oder Vernachlässigung auf sexuelle Aggression gefunden. Die Ergebnisse dieser Studie zeigen Risikofaktoren auf, die potentiell veränderbar und daher relevant für die Entwicklung von Präventionsprogrammen zur Vorbeugung früher sexueller Gewalt unter Jugendlichen in Risikogruppen sind.

Keywords: sexuelle Aggression, Kindesmisshandlung, Jugendliche, Mediatoren Modell

Name of translator: Matthias Knefel

**Citation:** European Journal of Psychotraumatology 2014, 5: 24533 - <http://dx.doi.org/10.3402/ejpt.v5.24533>
