# Supplementary material
Source: publisher figshare collection journal article supplement (https://tandf.figshare.com/articles/dataset/_/21829536)
Supplement: Supplementary file 6 [file 1]

## 儿童期虐待对青少年性攻击的影响调查：在一个非监禁的丹麦青少年样本检查多因中介模型

Rikke Holm Bramsen

本研究目的是调查儿童期虐待和青年早期严重同伴性攻击的关系，采用了多因中介模型。本研究纳入了 330 位男性，9 年级学生，平均年龄 14.9 岁（SD=0.5）。中介模型的估计显示，儿童期的躯体虐待和性虐待对性攻击有显著的间接效应，这种效应通过同伴影响、不安全-敌意的男子气起作用。儿童期性虐待和儿童忽视对性攻击整体而言没有显著作用。本研究识别出了潜在的可以改变的危险因素，为设计针对青年早期，同伴性攻击高风险人群的预防计划提供了有价值的信息。

**Keywords:** 性攻击、儿童期虐待、青少年、中介模型

**Name of translator:** Zhonglin Tan

**Citation:** European Journal of Psychotraumatology 2014, 5: 24533 - <http://dx.doi.org/10.3402/ejpt.v5.24533>
