# Supplementary material
Source: publisher figshare collection journal article supplement (https://tandf.figshare.com/articles/dataset/_/21829536)
Supplement: Supplementary file 7 [file 1]

## **A gyermekkori bántalmazás hatása a kortársak közötti szexuális agresszióra: Egy multi-mediátoros modell tesztelése nem-bebörtönzött dán serdülő mintán**

Rikke Holm Bramsen

A tanulmány célja, a gyermekkori bántalmazás és a súlyos kora serdülőkori kortársak közötti szexuális agresszió közötti kapcsolat vizsgálata multi-mediátor modellezéssel.

Háromszázharminc kilencedikes fiú vett részt a vizsgálatban (átlagéletkor: 14,9 év (SD = 0,5)). A modellezés alapján a gyermekkori fizikai bántalmazás és a szexuális agresszió között szignifikáns közvetett hatás van, ami a kortárs befolyásoláson és a bizonytalan-ellenséges maszkulinitáson keresztül hat. Nem volt szignifikáns direkt hatása a gyermekkori szexuális bántalmazásnak, illetve az elhanyagolásnak. A vizsgálati eredmények kockázati tényezőket azonosítanak, amelyek megváltoztathatóak és ezért fontos figyelembe venni őket veszélyeztetett fiatalok prevenció programjainak tervezésekor.

Keywords: szexuális agresszió, gyermekkibántalmazás, serdülőkor, mediátor modell

Name of translator: Kinga Fodor

**Citation:** European Journal of Psychotraumatology 2014, 5: 24533 - <http://dx.doi.org/10.3402/ejpt.v5.24533>
