# Supplementary material
Source: publisher figshare collection journal article supplement (https://tandf.figshare.com/articles/dataset/_/21829536)
Supplement: Supplementary file 8 [file 1]

# **Çocukluk Dönemindeki Kötü Muamelenin Ergenlik Döneminde Akranlar Arasındaki Cinsel Saldırganlık üzerindeki Etkisinin İncelenmesi: Gözetim Altında Olmayan Danimarkalı Ergenlerden Oluşan bir Örneklemde bir Çoklu Aracı Değişken Modelinin Test Edilmesi**

Rikke Holm Bramsen

Bu çalışmanın amacı, çoklu bir aracı değişken modeli kullanarak, çocuklukta kötü muamele ve erken ergenlik döneminde akranlar arasındaki şiddetli cinsel saldırganlık arasındaki ilişkiyi incelemektir. Çalışmaya ortalama yaşları 14.9 (SS = 0.5) olan 9. sınıf öğrencisi 330 erkek katılmıştır. Aracı değişken modelindeki oranlar çocuklukta fiziksel istismarın akran etkisi ve güvenli olmayan-saldırgan maskülinite yoluyla cinsel saldırganlık üzerinde anlamlı dolaylı etkileri olduğunu göstermiştir. Çocuklukta cinsel istismar ve çocuklukta ihmalin cinsel saldırganlık üzerinde anlamlı toplam etkisi bulunmamıştır. Bu çalışmanın bulguları değiştirilebilir olma olasılığı olan risk etkenlerini belirlemektedir ve bu nedenle risk altındaki gençlerde erken ergenlik dönemindeki akranlar arasındaki cinsel saldırganlığı hedef alan önleyici programların tasarlanması için bilgi sağlaması açısından değerlidir.

Anahtar kelimeler: cinsel saldırganlık, çocuklukta kötü muamele, ergenlik, aracı değişken modeli

Name of translator: Gozde Ikizer

**Citation:** European Journal of Psychotraumatology 2014, 5: 24533 - <http://dx.doi.org/10.3402/ejpt.v5.24533>
